# Supplementary material for: The bonding situations in ruthenium chalcogenonitrosyl compounds: a physical reasoning
Source: Royal Society of Chemistry journal article supplement (doi:10.1039/d4dt02680b), 2024-11-08
Supplement: d4dt02680b1.pdf [file d4dt02680b1.pdf]

# Supporting Information:

## The Bonding Situations in Ruthenium Chalcogenonitrosyl Compounds: A Physical Reasoning

Richard F. Cardoso,<sup>†</sup> Vinícius A. Glitz,<sup>†</sup> Giovanni F. Caramori,<sup>\*,†</sup> Renato L. T.  
Parreira,<sup>‡</sup> and Luis H. S. Lacerda<sup>\*,†</sup>

<sup>†</sup>*Department of Chemistry, Federal University of Santa Catarina, Florianópolis, Santa  
Catarina, Brazil*

<sup>‡</sup>*Research Center in Exact and Technological Sciences, University of Franca, Franca, São  
Paulo, Brazil*

E-mail: giovanni.caramori@ufsc.br; luis.lacerda@ufsc.br

Phone: +55 (48)3721-3607

## List of Figures

|    |                                                                                                                                                                                                                                                                                                                                                      |      |
|----|------------------------------------------------------------------------------------------------------------------------------------------------------------------------------------------------------------------------------------------------------------------------------------------------------------------------------------------------------|------|
| S1 | 2D chemical structure of the ligand $L_{OEt}^-$ . Optimized geometries of ruthenium chalcogenonitrosyl complexes in the oxidized form ( $\{N-E\}^+$ )( <b>1a-4a</b> ) (E= O, S, Se, Te), color code: C = gray, H = white, Cl = green, P = orange, O = red, N = cyan, S = blue-green, Se = pale yellow, Te = beige, Co = purple, Ru = yellow. . . . . | S-6  |
| S2 | Optimized geometries of ruthenium chalcogenonitrosyl complexes in the reduced form ( $\{N-E\}^0$ ) ( <b>1b-4b</b> ) (E= O, S, Se, Te), color code: C = gray, H = white, Cl = green, P = orange, O = red, N = cyan, S = blue-green, Se = pale yellow, Te = beige, Co = purple, Ru = yellow. . . . .                                                   | S-7  |
| S3 | Relative values of GKS-EDA components obtained by bending the angle Ru-N-S. . . . .                                                                                                                                                                                                                                                                  | S-10 |
| S4 | Relative values of GKS-EDA components obtained by bending the angle Ru-N-Se. . . . .                                                                                                                                                                                                                                                                 | S-10 |
| S5 | Relative values of GKS-EDA components obtained by bending the angle Ru-N-Te. . . . .                                                                                                                                                                                                                                                                 | S-11 |
| S6 | Frontier molecular orbitals and energies for the oxidized compounds. Isosurface value 0.06. . . . .                                                                                                                                                                                                                                                  | S-12 |
| S7 | Frontier molecular orbitals and energies for the reduced compounds. Isosurface value 0.06. . . . .                                                                                                                                                                                                                                                   | S-13 |

## List of Tables

|    |                                                                                                                                                                                                    |     |
|----|----------------------------------------------------------------------------------------------------------------------------------------------------------------------------------------------------|-----|
| S1 | Löwdin Atomic Charges ( $q^{Löwdin}$ ) and Bond Orders ( $b_{AB}^{Löwdin}$ ) for compounds <b>1a-4b</b> . . . . .                                                                                  | S-8 |
| S2 | Bond length ( $\text{Å}$ ), Löwdin Bond Order ( $b_{AB}^{Löwdin}$ ), vibrational frequency ( $\nu_{N-E}$ , $cm^{-1}$ ) and Hirshfeld charge for the diatomic chalcogenonitrosyl molecules. . . . . | S-9 |

|     |                                                                                                  |      |
|-----|--------------------------------------------------------------------------------------------------|------|
| S3  | Hirshfeld charge for the compounds <b>1a-4b</b> . . . . .                                        | S-9  |
| S4  | CHELPG charge for the compounds <b>1a-4b</b> . . . . .                                           | S-9  |
| S5  | Frontier Molecular Orbital Population Analysis, Löwdin Atomic charge. En-<br>ergy in eV. . . . . | S-10 |
| S6  | Cartesian coordinates for the optimized structure <b>1a</b> . . . . .                            | S-14 |
| S7  | Cartesian coordinates for the optimized structure <b>2a</b> . . . . .                            | S-15 |
| S8  | Cartesian coordinates for the optimized structure <b>3a</b> . . . . .                            | S-16 |
| S9  | Cartesian coordinates for the optimized structure <b>4a</b> . . . . .                            | S-17 |
| S10 | Cartesian coordinates for the optimized structure <b>1b</b> . . . . .                            | S-18 |
| S11 | Cartesian coordinates for the optimized structure <b>2b</b> . . . . .                            | S-19 |
| S12 | Cartesian coordinates for the optimized structure <b>3b</b> . . . . .                            | S-20 |
| S13 | Cartesian coordinates for the optimized structure <b>4b</b> . . . . .                            | S-21 |

## Frontier Molecular Population Analysis

In the frontier molecular orbitals for oxidized species, the contribution from the cobalt center in **1a** was observed to persist following the replacement of oxygen by other chalcogen atoms (**2a-4a**). The analysis of the adjacent orbitals indicates that the HOMO-1 behaves similarly for all oxidized compounds, whereas the HOMO-2 for **1a** exhibits a distinct pattern compared to **2a**, **3a**, and **4a**. The HOMO-1 orbitals are constituted by the combination of the  $p(\text{Cl})/d(\text{Ru})/\pi(\text{NE})$ , while for the HOMO-2, **1a** has a contribution solely from  $p(\text{Cl})$ , whereas **2a-4a** have the same contributions as HOMO-1.

The lowest unoccupied molecular orbital (LUMO) and LUMO+1 orbitals are composed of  $d(\text{Ru})/\pi^*(\text{NE})$  and **1a** has a small contribution from  $d(\text{Co})$ . The LUMO+2 has a major contribution from the  $d(\text{Co})$  and  $p(\text{PO})$  groups *trans* to chloride's, as well as the  $\pi$  orbitals of cyclopentadienyl. Again, **1a** shows different behavior compared to **2a-4a**, which have contributions from  $d(\text{Ru})/\pi^*(\text{NO})$ .

The Frontier Molecular Orbital Population analysis (FMOP) by Löwdin charges (Table S3) show that in the HOMO orbital, ruthenium exhibits approximately 0.56, while  $\text{Cl}_1$  0.17,  $\text{Cl}_2$  ca. 0.18 and the  $\text{L}_{\text{OEt}}^-$  ca. 0.09 contribution, with energies of -4.64, -4.60, -4.63 and -4.65 eV for **1a-4a**, respectively. In the LUMO orbital, **1a** exhibits different behavior compared to **2a-4a**. The ruthenium contribution is 0.25, 0.32, 0.34 and 0.35 for **1a-4a**, and the chalcogenonitrosyl contributes 0.47, 0.60, 0.58 and 0.57 for **1a-4a**, respectively. The main difference is the contribution of  $\text{L}_{\text{OEt}}^-$ , which is 0.27 for **1a**, while in **2a-4a** the contribution is approximately 0.05. The energy of the LUMO orbital is -2.91, -3.39, -3.40 and -3.48 eV for **1a-4a**, respectively.

Differently, the HOMO-1 have the main contribution from  $d(\text{Ru})/\pi(\text{NE})$  and for **1b-2b** have the contribution from two chlorides. For **3b-4b** have the contribution of just one chloride. It is also possible to observe that as the size of the chalcogen increases, its contribution from the atomic orbital to the formation of the molecular orbital also increases.

The analysis of lowest unoccupied molecular orbital for reduced complex show the same

contribution for LUMO, LUMO+1 and LUMO+2, with exception of NO in LUMO+2 which have the contribution from  $p(\text{Cl})$ . The LUMO and LUMO+1 orbitals is located mainly in  $\text{L}_{\text{OEt}^-}$  portion and the LUMO+2 have the contribution from  $d(\text{Co})/\pi^*(\text{NE})$ .

The Löwdin charge (Table S3) for the frontier molecular orbital, show the principal contribution from Ru and NE in the SOMO orbital. For the **1b** ruthenium is 0.48 and NO 0.39. Interestingly, going from S to Te the contribution of ruthenium down to ca. 0.40 and the NE increase to ca. 0.49. The chlorides ligand contribute only with 0.02 and the  $\text{L}_{\text{OEt}^-}$  ca. 0.07. For the LUMO, the Löwdin charge show the mainly contribution is from  $\text{L}_{\text{OEt}^-}$ , with value of 0.99. The SOMO energies is -0.16, -0.14, -0.43, and -0.61 eV for **1b-4b**, respectively, and the LUMO energies is 0.12, 0.10, 0.02, and -0.04 for **1b-4b**, respectively. So, conform the chalcogen increase, the SOMO and LUMO is stabilized, mainly in the energy of SOMO orbitals.

The difference between the energy of frontier molecular orbitals in oxidized species have a different behavior from reduced species. For **1a-4a** the difference is 1.73, 1.21, 1.23, and 1.17 eV, respectively and for **1b-4b** the difference is 0.28, 0.24, 0.45, and 0.57 eV, respectively.

## Figures and Tables

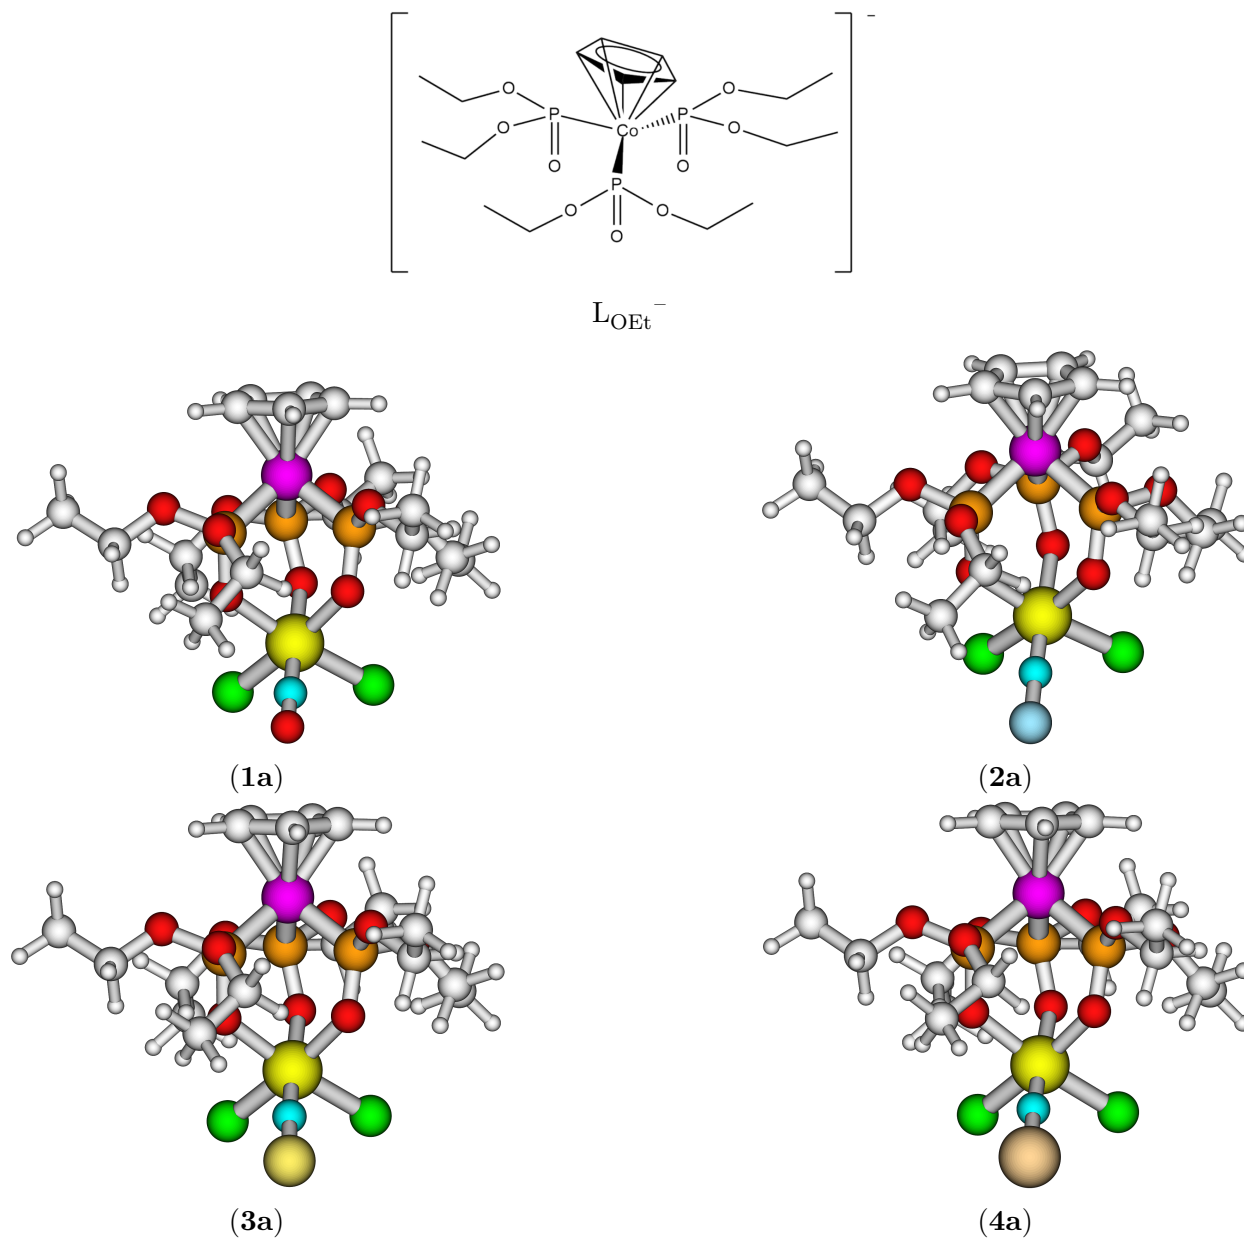

Figure S1: 2D chemical structure of the ligand  $L_{OEt}^-$ . Optimized geometries of ruthenium chalcogenonitrosyl complexes in the oxidized form ( $\{N-E\}^+$ )(**1a-4a**) (E= O, S, Se, Te), color code: C = gray, H = white, Cl = green, P = orange, O = red, N = cyan, S = blue-green, Se = pale yellow, Te = beige, Co = purple, Ru = yellow.

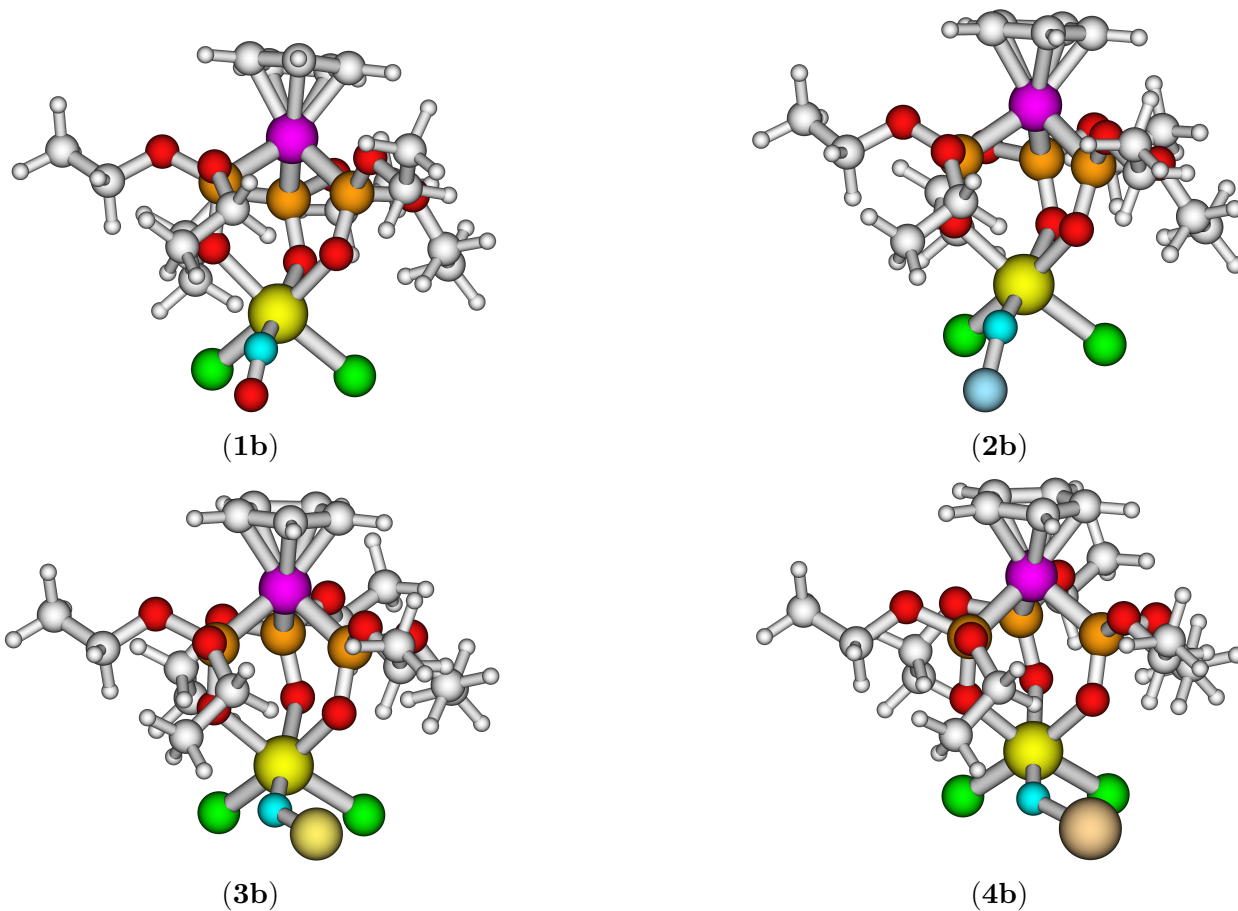

Figure S2: Optimized geometries of ruthenium chalcogenonitrosyl complexes in the reduced form ( $\{N-E\}^0$ ) (**1b-4b**) (E= O, S, Se, Te), color code: C = gray, H = white, Cl = green, P = orange, O = red, N = cyan, S = blue-green, Se = pale yellow, Te = beige, Co = purple, Ru = yellow.

Table S1: Löwdin Atomic Charges ( $q^{Löwdin}$ ) and Bond Orders ( $b_{AB}^{Löwdin}$ ) for compounds **1a-4b**.

| Atom/Bond                      | $q^{Löwdin}$ |           |                                | $b_{AB}^{Löwdin}$ |           |                                |           |           |                                |           |           |
|--------------------------------|--------------|-----------|--------------------------------|-------------------|-----------|--------------------------------|-----------|-----------|--------------------------------|-----------|-----------|
|                                | <b>1a</b>    | <b>1b</b> | Bond                           | <b>1a</b>         | <b>1b</b> | Bond                           |           |           |                                |           |           |
| Ru                             | -0.381       | -0.536    | Ru-N                           | 2.177             | 1.921     | Ru-N                           | -0.371    | -0.497    | Ru-N                           | 2.158     | 1.998     |
| N                              | -0.061       | -0.129    | N-O                            | 2.648             | 2.495     | N-Te                           | -0.237    | -0.267    | N-Te                           | 2.303     | 2.025     |
| O                              | 0.151        | 0.005     | Ru-Cl <sub>1</sub>             | 1.323             | 1.286     | Ru-Cl <sub>1</sub>             | 0.306     | -0.002    | Ru-Cl <sub>1</sub>             | 1.330     | 1.307     |
| Cl <sub>1</sub>                | -0.019       | -0.097    | Ru-Cl <sub>2</sub>             | 1.316             | 1.287     | Ru-Cl <sub>2</sub>             | 0.000     | -0.057    | Ru-Cl <sub>2</sub>             | 1.329     | 1.284     |
| Cl <sub>2</sub>                | -0.017       | -0.092    | Ru-O <sub>1</sub>              | 0.643             | 0.432     | Ru-O <sub>1</sub>              | 0.001     | -0.088    | Ru-O <sub>1</sub>              | 0.644     | 0.553     |
| O <sub>1</sub>                 | -0.132       | -0.151    | Ru-O <sub>2</sub>              | 0.633             | 0.556     | O <sub>1</sub>                 | -0.129    | -0.125    | Ru-O <sub>2</sub>              | 0.632     | 0.601     |
| O <sub>2</sub>                 | -0.146       | -0.137    | Ru-O <sub>3</sub>              | 0.692             | 0.553     | O <sub>2</sub>                 | -0.140    | -0.118    | Ru-O <sub>3</sub>              | 0.641     | 0.461     |
| O <sub>3</sub>                 | -0.130       | -0.129    | P <sub>1</sub> -O <sub>1</sub> | 1.906             | 1.997     | O <sub>3</sub>                 | -0.137    | -0.148    | P <sub>1</sub> -O <sub>1</sub> | 1.903     | 1.992     |
| N-O                            | 0.090        | -0.280    | P <sub>2</sub> -O <sub>2</sub> | 1.896             | 1.988     | N-Te                           | 0.069     | -0.269    | P <sub>2</sub> -O <sub>2</sub> | 1.897     | 1.958     |
| P <sub>1</sub> -O <sub>1</sub> | 0.191        | 0.166     | P <sub>3</sub> -O <sub>3</sub> | 1.868             | 2.068     | P <sub>1</sub> -O <sub>1</sub> | 0.194     | 0.195     | P <sub>3</sub> -O <sub>3</sub> | 1.894     | 2.047     |
| P <sub>2</sub> -O <sub>2</sub> | 0.171        | 0.188     | —                              | —                 | —         | P <sub>2</sub> -O <sub>2</sub> | 0.179     | 0.206     | —                              | —         | —         |
| P <sub>3</sub> -O <sub>3</sub> | 0.194        | 0.197     | —                              | —                 | —         | P <sub>3</sub> -O <sub>3</sub> | 0.182     | 0.167     | —                              | —         | —         |
|                                | <b>2a</b>    | <b>2b</b> |                                | <b>2a</b>         | <b>2b</b> |                                | <b>4a</b> | <b>4b</b> |                                | <b>4a</b> | <b>4b</b> |
| Ru                             | -0.384       | -0.532    | Ru-N                           | 2.102             | 1.874     | Ru                             | -0.346    | -0.461    | Ru-N                           | 2.254     | 2.143     |
| N                              | -0.270       | -0.324    | N-S                            | 2.458             | 2.281     | N                              | -0.263    | -0.292    | N-Te                           | 1.967     | 1.638     |
| S                              | 0.360        | 0.119     | Ru-Cl <sub>1</sub>             | 1.333             | 1.302     | Te                             | 0.255     | -0.114    | Ru-Cl <sub>1</sub>             | 1.322     | 1.302     |
| Cl <sub>1</sub>                | -0.002       | -0.074    | Ru-Cl <sub>2</sub>             | 1.329             | 1.301     | Cl <sub>1</sub>                | 0.015     | -0.029    | Ru-Cl <sub>2</sub>             | 1.321     | 1.283     |
| Cl <sub>2</sub>                | -0.003       | -0.074    | Ru-O <sub>1</sub>              | 0.643             | 0.563     | Cl <sub>2</sub>                | 0.014     | -0.074    | Ru-O <sub>1</sub>              | 0.642     | 0.552     |
| O <sub>1</sub>                 | -0.130       | -0.128    | Ru-O <sub>2</sub>              | 0.632             | 0.558     | O <sub>1</sub>                 | -0.127    | -0.124    | Ru-O <sub>2</sub>              | 0.629     | 0.599     |
| O <sub>2</sub>                 | -0.142       | -0.137    | Ru-O <sub>3</sub>              | 0.651             | 0.486     | O <sub>2</sub>                 | -0.137    | -0.118    | Ru-O <sub>3</sub>              | 0.623     | 0.453     |
| O <sub>3</sub>                 | -0.135       | -0.146    | P <sub>1</sub> -O <sub>1</sub> | 1.904             | 1.983     | O <sub>3</sub>                 | -0.139    | -0.150    | P <sub>1</sub> -O <sub>1</sub> | 1.903     | 1.988     |
| N-S                            | 0.090        | -0.205    | P <sub>2</sub> -O <sub>2</sub> | 1.897             | 1.977     | N-Te                           | -0.008    | -0.406    | P <sub>2</sub> -O <sub>2</sub> | 1.895     | 1.951     |
| P <sub>1</sub> -O <sub>1</sub> | 0.193        | 0.198     | P <sub>3</sub> -O <sub>3</sub> | 1.890             | 2.034     | P <sub>1</sub> -O <sub>1</sub> | 0.194     | 0.202     | P <sub>3</sub> -O <sub>3</sub> | 1.903     | 2.048     |
| P <sub>2</sub> -O <sub>2</sub> | 0.179        | 0.185     | —                              | —                 | —         | P <sub>2</sub> -O <sub>2</sub> | 0.181     | 0.197     | —                              | —         | —         |
| P <sub>3</sub> -O <sub>3</sub> | 0.184        | 0.180     | —                              | —                 | —         | P <sub>3</sub> -O <sub>3</sub> | 0.185     | 0.171     | —                              | —         | —         |

P<sub>1</sub>-O<sub>1</sub> is *trans* to Cl<sub>1</sub>; P<sub>2</sub>-O<sub>2</sub> is *trans* to Cl<sub>2</sub>; P<sub>3</sub>-O<sub>3</sub> is *trans* to N-X, X = O, S, Se, Te.



Table S2: Bond length (Å), Löwdin Bond Order ( $b_{AB}^{Löwdin}$ ), vibrational frequency ( $\nu_{N-E}$ ,  $cm^{-1}$ ) and Hirshfeld charge for the diatomic chalcogenonitrosyl molecules.

|      | bond length        |                    | $b_{AB}^{Löwdin}$  |                    | $\nu_{N-E}$        |                    | Hirshfeld          |                    |
|------|--------------------|--------------------|--------------------|--------------------|--------------------|--------------------|--------------------|--------------------|
|      | (N-E) <sup>+</sup> | (N-E) <sup>0</sup> |
| N≡O  | 1.070              | 1.158              | 3.602              | 3.034              | 2356               | 1880               | 1                  | 0                  |
| N≡S  | 1.444              | 1.507              | 3.580              | 2.998              | 1429               | 1203               | 1                  | 0                  |
| N≡Se | 1.592              | 1.664              | 3.573              | 3.053              | 1132               | 959                | 1                  | 0                  |
| N≡Te | 1.807              | 1.876              | 3.425              | 2.749              | 947                | 807                | 1                  | 0                  |

Table S3: Hirshfeld charge for the compounds **1a-4b**.

|                                                      | <b>1a</b> | <b>1b</b> | <b>2a</b> | <b>2b</b> | <b>3a</b> | <b>3b</b> | <b>4a</b> | <b>4b</b> |
|------------------------------------------------------|-----------|-----------|-----------|-----------|-----------|-----------|-----------|-----------|
| Ru                                                   | 0.47      | 0.35      | 0.50      | 0.38      | 0.50      | 0.41      | 0.51      | 0.42      |
| N                                                    | 0.04      | -0.07     | -0.10     | -0.18     | -0.12     | -0.19     | -0.17     | -0.22     |
| E                                                    | -0.02     | -0.15     | 0.10      | -0.14     | 0.11      | -0.17     | 0.15      | -0.18     |
| Cl <sub>1</sub>                                      | -0.29     | -0.36     | -0.28     | -0.34     | -0.28     | -0.33     | -0.27     | -0.32     |
| Cl <sub>2</sub>                                      | -0.29     | -0.36     | -0.28     | -0.35     | -0.28     | -0.35     | -0.27     | -0.34     |
| O <sub>1</sub>                                       | -0.28     | -0.27     | -0.28     | -0.27     | -0.28     | -0.27     | -0.28     | -0.27     |
| O <sub>2</sub>                                       | -0.28     | -0.27     | -0.28     | -0.27     | -0.28     | -0.26     | -0.28     | -0.26     |
| O <sub>3</sub>                                       | -0.27     | -0.29     | -0.28     | -0.28     | -0.27     | -0.29     | -0.28     | -0.29     |
| (NE) <sup>+0</sup>                                   | 0.02      | -0.22     | 0.00      | -0.32     | -0.01     | -0.36     | -0.02     | -0.40     |
| [RuCl <sub>2</sub> (L <sub>OEt</sub> )] <sup>-</sup> | -0.02     | -0.78     | 0.00      | -0.68     | 0.01      | -0.64     | 0.02      | -0.60     |

Table S4: CHELPG charge for the compounds **1a-4b**.

|                                                      | <b>1a</b> | <b>1b</b> | <b>2a</b> | <b>2b</b> | <b>3a</b> | <b>3b</b> | <b>4a</b> | <b>4b</b> |
|------------------------------------------------------|-----------|-----------|-----------|-----------|-----------|-----------|-----------|-----------|
| Ru                                                   | -0.10     | 0.51      | 0.34      | 0.56      | 0.42      | 0.67      | 0.46      | 0.69      |
| N                                                    | 0.44      | 0.13      | -0.05     | -0.11     | -0.14     | -0.21     | -0.17     | -0.21     |
| E                                                    | -0.17     | -0.29     | 0.10      | -0.20     | 0.14      | -0.23     | 0.17      | -0.27     |
| Cl <sub>1</sub>                                      | -0.29     | -0.45     | -0.31     | -0.43     | -0.31     | -0.41     | -0.32     | -0.41     |
| Cl <sub>2</sub>                                      | -0.30     | -0.45     | -0.31     | -0.43     | -0.32     | -0.46     | -0.32     | -0.46     |
| O <sub>1</sub>                                       | -0.34     | -0.46     | -0.35     | -0.35     | -0.36     | -0.45     | -0.37     | -0.44     |
| O <sub>2</sub>                                       | -0.28     | -0.45     | -0.31     | -0.34     | -0.31     | -0.33     | -0.31     | -0.25     |
| O <sub>3</sub>                                       | -0.15     | -0.38     | -0.32     | -0.42     | -0.35     | -0.45     | -0.35     | -0.45     |
| (NE) <sup>+0</sup>                                   | 0.27      | -0.16     | 0.05      | -0.32     | 0.00      | -0.45     | 0.00      | -0.48     |
| [RuCl <sub>2</sub> (L <sub>OEt</sub> )] <sup>-</sup> | -0.27     | -0.84     | -0.05     | -0.68     | 0.00      | -0.55     | 0.00      | -0.52     |

Table S5: Frontier Molecular Orbital Population Analysis, Löwdin Atomic charge. Energy in eV.

| Complex   | HOMO |      |                 |                 |                               |        | LUMO |      |                 |                 |                               |        |
|-----------|------|------|-----------------|-----------------|-------------------------------|--------|------|------|-----------------|-----------------|-------------------------------|--------|
|           | Ru   | NE   | Cl <sub>1</sub> | Cl <sub>2</sub> | L <sub>OEt</sub> <sup>-</sup> | Energy | Ru   | NE   | Cl <sub>1</sub> | Cl <sub>2</sub> | L <sub>OEt</sub> <sup>-</sup> | Energy |
| <b>1a</b> | 0.56 | 0.00 | 0.17            | 0.18            | 0.08                          | -4.64  | 0.25 | 0.47 | 0.01            | 0.01            | 0.27                          | -2.91  |
| <b>2a</b> | 0.57 | 0.00 | 0.17            | 0.18            | 0.09                          | -4.60  | 0.32 | 0.60 | 0.01            | 0.01            | 0.05                          | -3.39  |
| <b>3a</b> | 0.56 | 0.00 | 0.17            | 0.18            | 0.09                          | -4.63  | 0.34 | 0.58 | 0.01            | 0.02            | 0.05                          | -3.40  |
| <b>4a</b> | 0.56 | 0.00 | 0.17            | 0.18            | 0.09                          | -4.65  | 0.35 | 0.57 | 0.02            | 0.02            | 0.05                          | -3.48  |
| Complex   | SOMO |      |                 |                 |                               |        | LUMO |      |                 |                 |                               |        |
|           | Ru   | NE   | Cl <sub>1</sub> | Cl <sub>2</sub> | L <sub>OEt</sub> <sup>-</sup> | Energy | Ru   | NE   | Cl <sub>1</sub> | Cl <sub>2</sub> | L <sub>OEt</sub> <sup>-</sup> | Energy |
| <b>1b</b> | 0.48 | 0.39 | 0.03            | 0.03            | 0.08                          | -0.16  | 0.00 | 0.00 | 0.00            | 0.00            | 0.99                          | 0.12   |
| <b>2b</b> | 0.38 | 0.49 | 0.02            | 0.02            | 0.09                          | -0.14  | 0.00 | 0.01 | 0.00            | 0.00            | 0.99                          | 0.10   |
| <b>3b</b> | 0.41 | 0.48 | 0.02            | 0.02            | 0.07                          | -0.43  | 0.02 | 0.01 | 0.00            | 0.00            | 0.98                          | 0.02   |
| <b>4b</b> | 0.40 | 0.51 | 0.02            | 0.02            | 0.05                          | -0.61  | 0.01 | 0.00 | 0.00            | 0.00            | 0.99                          | -0.04  |

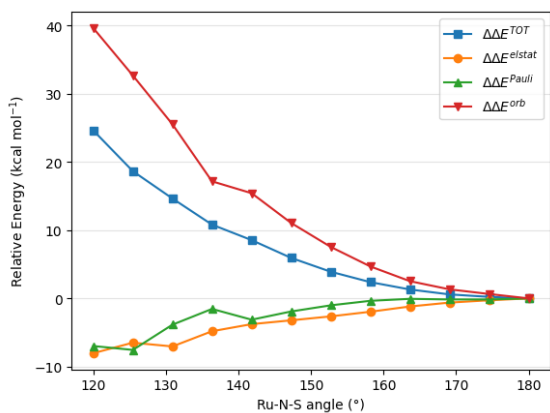

(a) GKS-EDA **2a**.

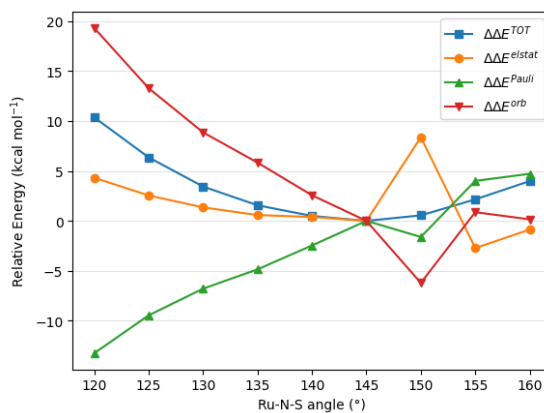

(b) GKS-EDA **2b**.

Figure S3: Relative values of GKS-EDA components obtained by bending the angle Ru–N–S.

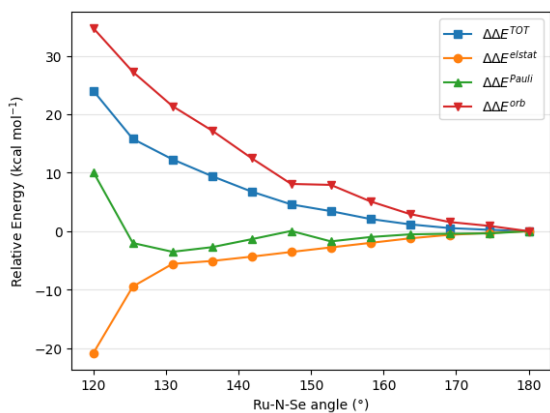

(a) GKS-EDA **3a**.

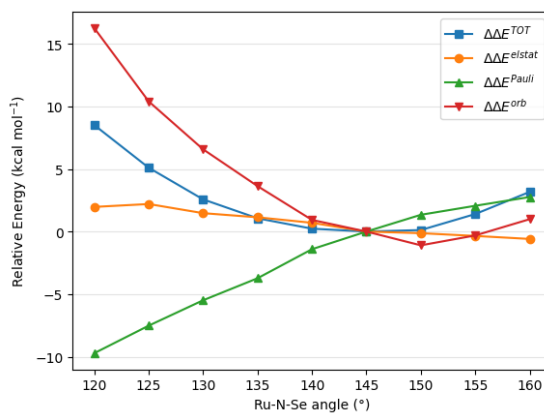

(b) GKS-EDA **3b**.

Figure S4: Relative values of GKS-EDA components obtained by bending the angle Ru–N–Se.

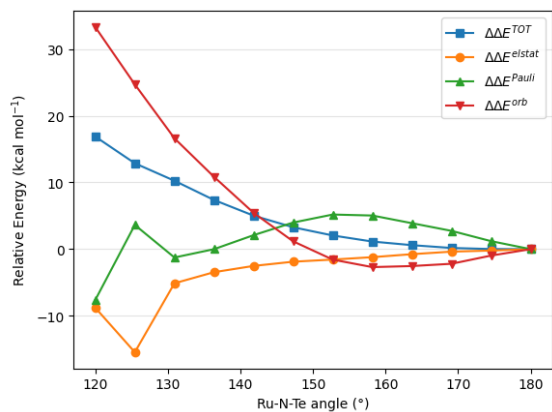

(a) GKS-EDA 4a.

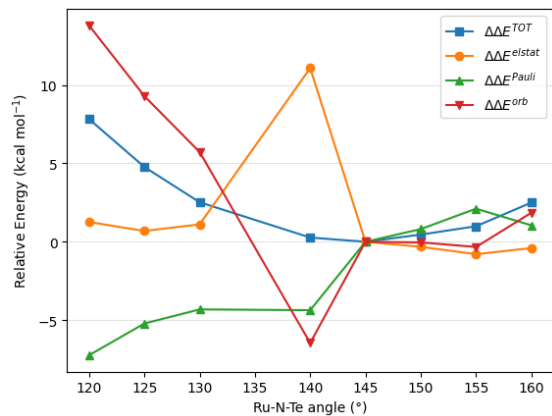

(b) GKS-EDA 4b.

Figure S5: Relative values of GKS-EDA components obtained by bending the angle Ru–N–Te.

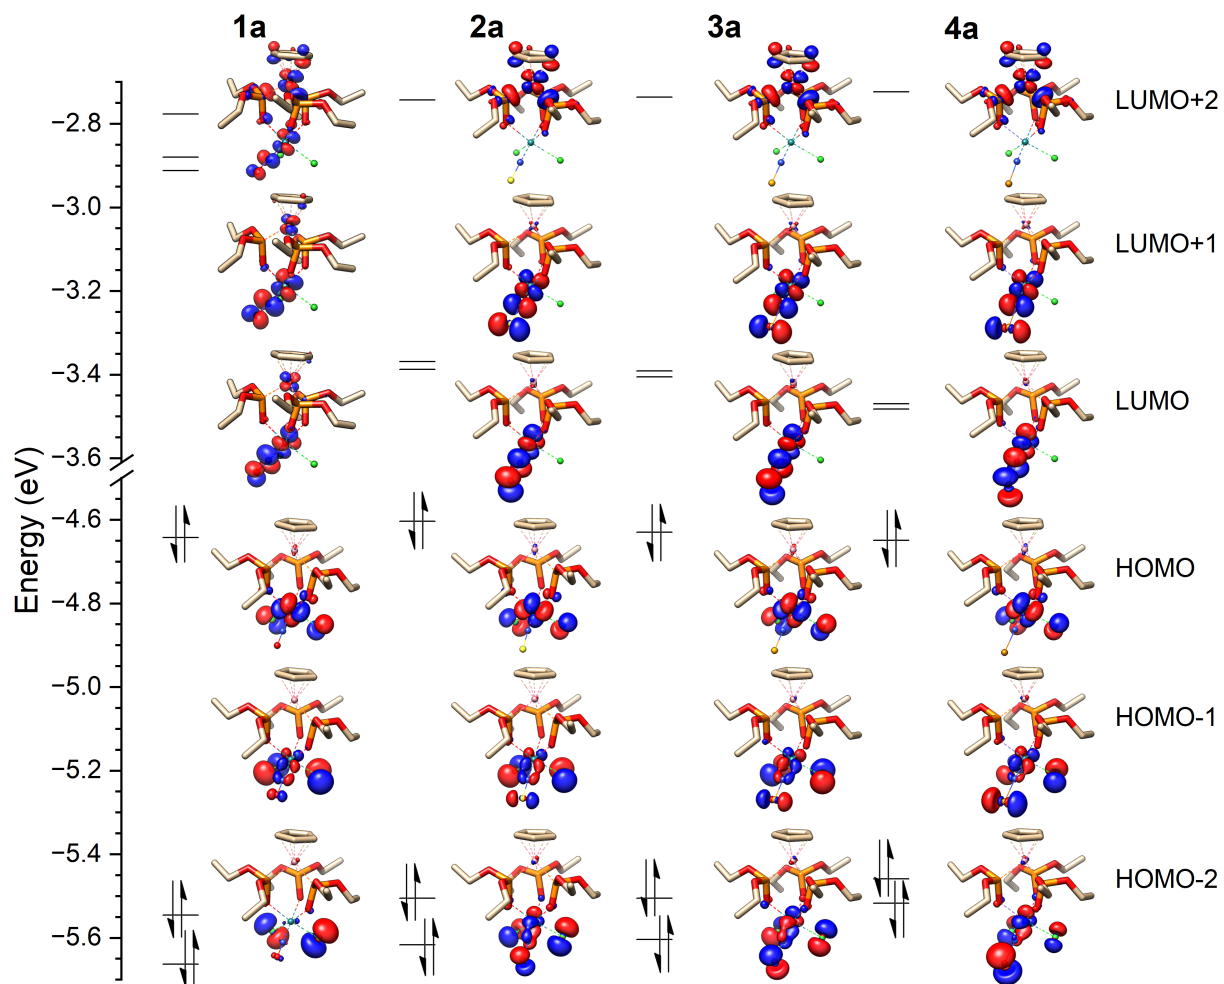

Figure S6: Frontier molecular orbitals and energies for the oxidized compounds. Isosurface value 0.06.

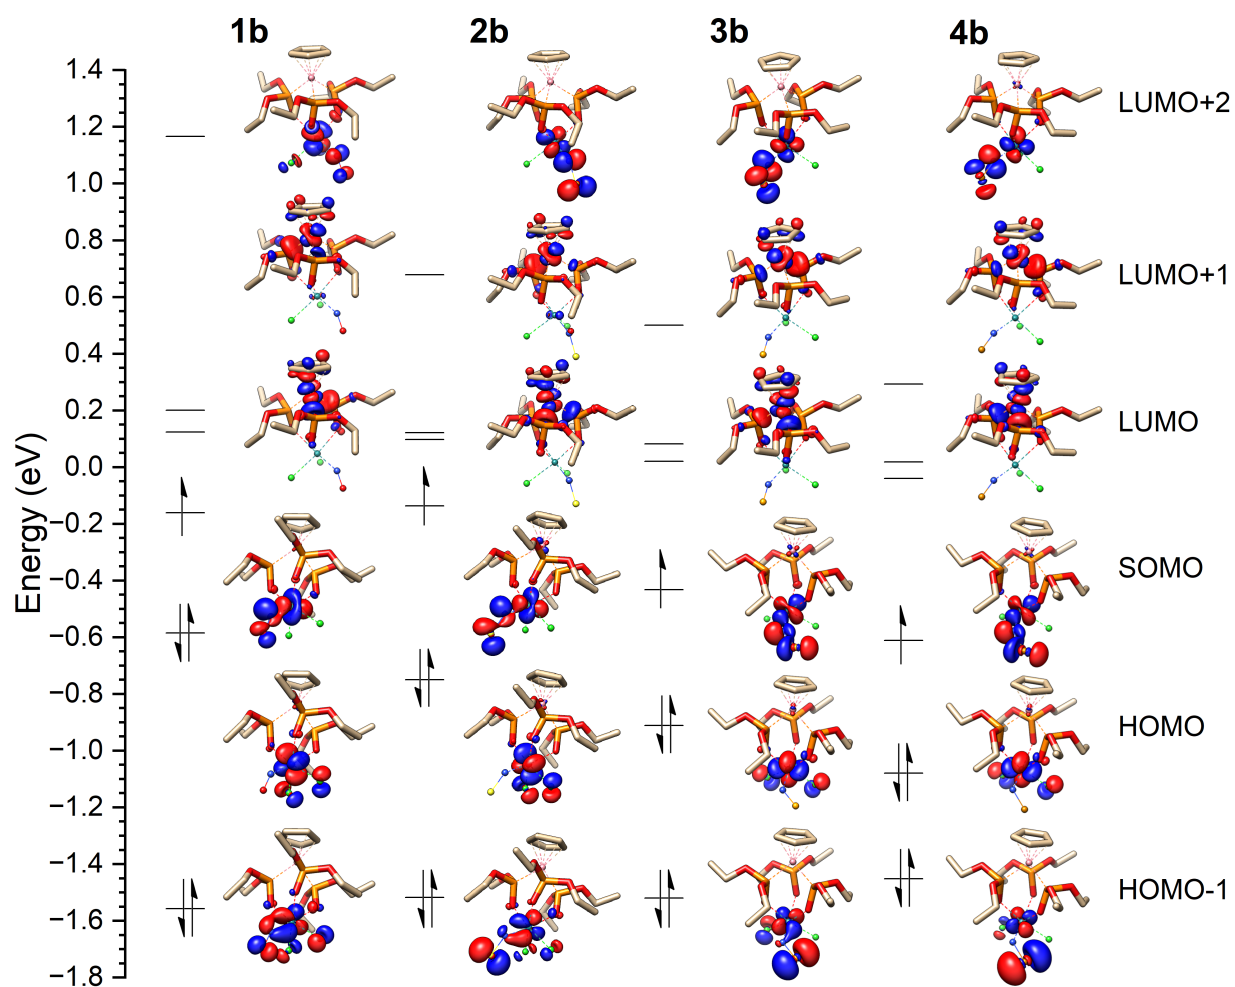

Figure S7: Frontier molecular orbitals and energies for the reduced compounds. Isosurface value 0.06.

Table S6: Cartesian coordinates for the optimized structure **1a**.

|    | x            | y            | z           |   | x            | y            | z            |
|----|--------------|--------------|-------------|---|--------------|--------------|--------------|
| N  | 11.908905000 | 12.876338000 | 2.819871000 | C | 15.441046000 | 15.445513000 | 5.637606000  |
| O  | 11.468070000 | 13.087637000 | 1.765421000 | H | 14.620807000 | 15.452695000 | 4.907992000  |
| Ru | 12.566782000 | 12.562210000 | 4.373654000 | H | 14.149626000 | 14.796272000 | 7.229128000  |
| Cl | 11.885119000 | 14.624719000 | 5.234848000 | C | 14.901539000 | 15.572229000 | 7.043238000  |
| Cl | 10.617255000 | 11.503659000 | 5.114947000 | H | 15.708563000 | 15.499341000 | 7.785368000  |
| P  | 14.594345000 | 11.388153000 | 6.680197000 | C | 15.077591000 | 13.126609000 | 10.167286000 |
| O  | 14.077063000 | 9.997467000  | 7.325060000 | H | 14.412523000 | 13.405255000 | 10.997361000 |
| O  | 14.437996000 | 13.383996000 | 3.822567000 | H | 15.565888000 | 14.037254000 | 9.796290000  |
| O  | 13.367744000 | 12.205983000 | 6.219922000 | H | 15.848767000 | 12.447661000 | 10.557109000 |
| O  | 13.352889000 | 10.679748000 | 3.846329000 | H | 14.883027000 | 5.967266000  | 3.965407000  |
| C  | 14.272140000 | 12.462662000 | 9.072719000 | C | 14.977237000 | 11.033197000 | 1.391842000  |
| H  | 13.495316000 | 13.129814000 | 8.671652000 | H | 16.154841000 | 16.249193000 | 5.399316000  |
| H  | 13.790233000 | 11.539234000 | 9.427050000 | H | 14.408631000 | 16.549029000 | 7.155564000  |
| C  | 12.794136000 | 9.385909000  | 6.980788000 | H | 13.565711000 | 11.199268000 | -0.226719000 |
| H  | 12.455161000 | 9.745067000  | 6.000454000 | H | 14.110574000 | 9.532437000  | 0.092999000  |
| H  | 13.006030000 | 8.309626000  | 6.918956000 | H | 12.944797000 | 10.321199000 | 1.193449000  |
| C  | 11.760089000 | 9.701654000  | 8.039920000 | H | 15.873135000 | 11.203263000 | 0.778724000  |
| H  | 11.529877000 | 10.774732000 | 8.040427000 | H | 14.706440000 | 11.982616000 | 1.873893000  |
| H  | 10.828182000 | 9.164947000  | 7.809471000 |   |              |              |              |
| H  | 12.102388000 | 9.392917000  | 9.038371000 |   |              |              |              |
| C  | 13.728431000 | 7.776206000  | 3.670305000 |   |              |              |              |
| O  | 14.740265000 | 8.608985000  | 4.314394000 |   |              |              |              |
| H  | 12.737548000 | 8.193809000  | 3.898676000 |   |              |              |              |
| H  | 13.881528000 | 7.817595000  | 2.580926000 |   |              |              |              |
| C  | 13.887519000 | 6.368264000  | 4.200555000 |   |              |              |              |
| H  | 13.748690000 | 6.340908000  | 5.289987000 |   |              |              |              |
| H  | 13.133716000 | 5.712356000  | 3.741667000 |   |              |              |              |
| C  | 13.830636000 | 10.484194000 | 0.566320000 |   |              |              |              |
| Co | 16.198342000 | 11.110506000 | 5.276420000 |   |              |              |              |
| P  | 15.810779000 | 13.046500000 | 4.437261000 |   |              |              |              |
| P  | 14.808583000 | 10.178564000 | 3.923158000 |   |              |              |              |
| O  | 16.887727000 | 13.243737000 | 3.228648000 |   |              |              |              |
| O  | 16.193570000 | 14.194470000 | 5.510272000 |   |              |              |              |
| O  | 15.191384000 | 12.119384000 | 7.990470000 |   |              |              |              |
| O  | 15.388639000 | 10.069130000 | 2.404918000 |   |              |              |              |
| C  | 18.201054000 | 11.643584000 | 5.555855000 |   |              |              |              |
| H  | 18.577319000 | 12.657804000 | 5.471392000 |   |              |              |              |
| C  | 17.692581000 | 11.041396000 | 6.742513000 |   |              |              |              |
| H  | 17.601178000 | 11.521009000 | 7.710306000 |   |              |              |              |
| C  | 17.257775000 | 9.713539000  | 6.413510000 |   |              |              |              |
| H  | 16.788226000 | 9.007008000  | 7.089929000 |   |              |              |              |
| C  | 17.517341000 | 9.502484000  | 5.025137000 |   |              |              |              |
| H  | 17.278620000 | 8.602490000  | 4.468839000 |   |              |              |              |
| C  | 18.091324000 | 10.694387000 | 4.486160000 |   |              |              |              |
| H  | 18.362776000 | 10.865294000 | 3.450592000 |   |              |              |              |
| C  | 16.832843000 | 14.461125000 | 2.433850000 |   |              |              |              |
| H  | 15.810601000 | 14.589068000 | 2.048050000 |   |              |              |              |
| H  | 17.067311000 | 15.319096000 | 3.084490000 |   |              |              |              |
| C  | 17.842027000 | 14.329596000 | 1.313282000 |   |              |              |              |
| H  | 17.600708000 | 13.472487000 | 0.669829000 |   |              |              |              |
| H  | 17.834149000 | 15.238168000 | 0.694046000 |   |              |              |              |
| H  | 18.856745000 | 14.191942000 | 1.711401000 |   |              |              |              |

Table S7: Cartesian coordinates for the optimized structure **2a**.

|    | x            | y            | z           |   | x            | y            | z            |
|----|--------------|--------------|-------------|---|--------------|--------------|--------------|
| N  | 11.959367000 | 12.895466000 | 2.783675000 | C | 15.434956000 | 15.446953000 | 5.650986000  |
| S  | 11.454894000 | 13.207720000 | 1.377071000 | H | 14.621377000 | 15.459535000 | 4.913982000  |
| Ru | 12.559148000 | 12.573704000 | 4.363424000 | H | 14.138994000 | 14.760968000 | 7.223800000  |
| Cl | 11.868086000 | 14.617332000 | 5.226187000 | C | 14.881334000 | 15.549735000 | 7.053260000  |
| Cl | 10.616041000 | 11.521740000 | 5.084401000 | H | 15.682619000 | 15.479215000 | 7.801862000  |
| P  | 14.598263000 | 11.388973000 | 6.690118000 | C | 15.097050000 | 13.109957000 | 10.184192000 |
| O  | 14.081787000 | 9.991381000  | 7.324921000 | H | 14.434234000 | 13.387917000 | 11.016374000 |
| O  | 14.432107000 | 13.394801000 | 3.838187000 | H | 15.583508000 | 14.021174000 | 9.811879000  |
| O  | 13.376069000 | 12.207955000 | 6.233001000 | H | 15.870144000 | 12.431649000 | 10.571443000 |
| O  | 13.349133000 | 10.694532000 | 3.845307000 | H | 14.872718000 | 5.978684000  | 3.977253000  |
| C  | 14.289318000 | 12.446002000 | 9.091097000 | C | 14.960141000 | 11.026316000 | 1.384762000  |
| H  | 13.509434000 | 13.112851000 | 8.695132000 | H | 16.144960000 | 16.259133000 | 5.430911000  |
| H  | 13.810217000 | 11.521024000 | 9.445541000 | H | 14.373366000 | 16.518031000 | 7.172432000  |
| C  | 12.789301000 | 9.399188000  | 6.982464000 | H | 13.578897000 | 11.109178000 | -0.266020000 |
| H  | 12.462822000 | 9.751005000  | 5.995251000 | H | 14.186650000 | 9.471438000  | 0.089935000  |
| H  | 12.982686000 | 8.318596000  | 6.934873000 | H | 12.964659000 | 10.229417000 | 1.154396000  |
| C  | 11.754182000 | 9.744471000  | 8.031367000 | H | 15.859782000 | 11.231278000 | 0.787893000  |
| H  | 11.544497000 | 10.821729000 | 8.021006000 | H | 14.636661000 | 11.965737000 | 1.853583000  |
| H  | 10.813654000 | 9.223526000  | 7.799413000 |   |              |              |              |
| H  | 12.084042000 | 9.438288000  | 9.034828000 |   |              |              |              |
| C  | 13.723822000 | 7.789273000  | 3.669485000 |   |              |              |              |
| O  | 14.733031000 | 8.621675000  | 4.316651000 |   |              |              |              |
| H  | 12.732144000 | 8.209378000  | 3.890093000 |   |              |              |              |
| H  | 13.883783000 | 7.826201000  | 2.580824000 |   |              |              |              |
| C  | 13.876826000 | 6.382734000  | 4.205699000 |   |              |              |              |
| H  | 13.732589000 | 6.360346000  | 5.294553000 |   |              |              |              |
| H  | 13.123872000 | 5.726615000  | 3.745591000 |   |              |              |              |
| C  | 13.856570000 | 10.417000000 | 0.543025000 |   |              |              |              |
| Co | 16.197819000 | 11.116471000 | 5.279508000 |   |              |              |              |
| P  | 15.807173000 | 13.053211000 | 4.443360000 |   |              |              |              |
| P  | 14.804212000 | 10.191700000 | 3.926538000 |   |              |              |              |
| O  | 16.876718000 | 13.247813000 | 3.227263000 |   |              |              |              |
| O  | 16.199139000 | 14.204961000 | 5.510263000 |   |              |              |              |
| O  | 15.204660000 | 12.106835000 | 8.005370000 |   |              |              |              |
| O  | 15.391173000 | 10.086449000 | 2.411205000 |   |              |              |              |
| C  | 18.200334000 | 11.649105000 | 5.559798000 |   |              |              |              |
| H  | 18.574344000 | 12.665071000 | 5.485727000 |   |              |              |              |
| C  | 17.695845000 | 11.032835000 | 6.740878000 |   |              |              |              |
| H  | 17.604876000 | 11.501965000 | 7.713865000 |   |              |              |              |
| C  | 17.261250000 | 9.708544000  | 6.397912000 |   |              |              |              |
| H  | 16.794382000 | 8.993715000  | 7.067496000 |   |              |              |              |
| C  | 17.518779000 | 9.513138000  | 5.006615000 |   |              |              |              |
| H  | 17.279760000 | 8.619279000  | 4.440551000 |   |              |              |              |
| C  | 18.090134000 | 10.711367000 | 4.479934000 |   |              |              |              |
| H  | 18.356672000 | 10.894985000 | 3.445275000 |   |              |              |              |
| C  | 16.810848000 | 14.461761000 | 2.428400000 |   |              |              |              |
| H  | 15.786013000 | 14.581376000 | 2.046784000 |   |              |              |              |
| H  | 17.042728000 | 15.323872000 | 3.074596000 |   |              |              |              |
| C  | 17.815730000 | 14.331874000 | 1.303621000 |   |              |              |              |
| H  | 17.575052000 | 13.471810000 | 0.663775000 |   |              |              |              |
| H  | 17.801105000 | 15.238731000 | 0.681864000 |   |              |              |              |
| H  | 18.832911000 | 14.199743000 | 1.697454000 |   |              |              |              |

Table S8: Cartesian coordinates for the optimized structure **3a**.

|    | x            | y            | z           |   | x            | y            | z            |
|----|--------------|--------------|-------------|---|--------------|--------------|--------------|
| N  | 11.977507000 | 12.915897000 | 2.783844000 | C | 15.439744000 | 15.450495000 | 5.653375000  |
| Se | 11.462218000 | 13.308938000 | 1.231038000 | H | 14.627322000 | 15.464755000 | 4.915177000  |
| Ru | 12.554777000 | 12.576778000 | 4.359026000 | H | 14.141209000 | 14.759275000 | 7.221990000  |
| Cl | 11.861190000 | 14.612076000 | 5.239221000 | C | 14.883695000 | 15.548683000 | 7.055069000  |
| Cl | 10.614327000 | 11.517616000 | 5.071679000 | H | 15.683816000 | 15.475869000 | 7.804668000  |
| P  | 14.597078000 | 11.388985000 | 6.692684000 | C | 15.093058000 | 13.112698000 | 10.185868000 |
| O  | 14.082414000 | 9.990866000  | 7.327630000 | H | 14.429298000 | 13.391105000 | 11.017151000 |
| O  | 14.429405000 | 13.400886000 | 3.849773000 | H | 15.580366000 | 14.023637000 | 9.814000000  |
| O  | 13.373247000 | 12.202890000 | 6.233708000 | H | 15.865422000 | 12.434192000 | 10.574224000 |
| O  | 13.348454000 | 10.700695000 | 3.843531000 | H | 14.871870000 | 5.986253000  | 3.963240000  |
| C  | 14.286442000 | 12.448651000 | 9.092000000 | C | 14.954462000 | 11.022134000 | 1.380053000  |
| H  | 13.507111000 | 13.115474000 | 8.694882000 | H | 16.149539000 | 16.263716000 | 5.436772000  |
| H  | 13.806616000 | 11.524018000 | 9.446408000 | H | 14.375431000 | 16.516547000 | 7.176557000  |
| C  | 12.790422000 | 9.398815000  | 6.983383000 | H | 13.589227000 | 11.067548000 | -0.285581000 |
| H  | 12.467290000 | 9.747584000  | 5.993953000 | H | 14.222033000 | 9.443542000  | 0.090401000  |
| H  | 12.982964000 | 8.317912000  | 6.939939000 | H | 12.975341000 | 10.190683000 | 1.135398000  |
| C  | 11.751950000 | 9.748784000  | 8.027532000 | H | 15.855409000 | 11.242826000 | 0.790875000  |
| H  | 11.542664000 | 10.826063000 | 8.011682000 | H | 14.607386000 | 11.956645000 | 1.841924000  |
| H  | 10.812096000 | 9.226835000  | 7.795149000 |   |              |              |              |
| H  | 12.078662000 | 9.447191000  | 9.033408000 |   |              |              |              |
| C  | 13.720254000 | 7.796965000  | 3.666763000 |   |              |              |              |
| O  | 14.729751000 | 8.627293000  | 4.316105000 |   |              |              |              |
| H  | 12.728567000 | 8.214935000  | 3.891311000 |   |              |              |              |
| H  | 13.877821000 | 7.839354000  | 2.577946000 |   |              |              |              |
| C  | 13.876000000 | 6.388021000  | 4.195795000 |   |              |              |              |
| H  | 13.734215000 | 6.360120000  | 5.284851000 |   |              |              |              |
| H  | 13.122796000 | 5.733238000  | 3.734187000 |   |              |              |              |
| C  | 13.870834000 | 10.387051000 | 0.531924000 |   |              |              |              |
| Co | 16.196643000 | 11.119056000 | 5.281808000 |   |              |              |              |
| P  | 15.806526000 | 13.056069000 | 4.447205000 |   |              |              |              |
| P  | 14.803536000 | 10.197587000 | 3.926821000 |   |              |              |              |
| O  | 16.870034000 | 13.246669000 | 3.225170000 |   |              |              |              |
| O  | 16.205654000 | 14.209902000 | 5.509444000 |   |              |              |              |
| O  | 15.202905000 | 12.108622000 | 8.007478000 |   |              |              |              |
| O  | 15.393870000 | 10.093928000 | 2.413502000 |   |              |              |              |
| C  | 18.198133000 | 11.651611000 | 5.568054000 |   |              |              |              |
| H  | 18.571472000 | 12.668337000 | 5.500952000 |   |              |              |              |
| C  | 17.692452000 | 11.027526000 | 6.744600000 |   |              |              |              |
| H  | 17.599979000 | 11.490566000 | 7.720370000 |   |              |              |              |
| C  | 17.259664000 | 9.705004000  | 6.392992000 |   |              |              |              |
| H  | 16.792512000 | 8.985706000  | 7.057563000 |   |              |              |              |
| C  | 17.519304000 | 9.518458000  | 5.000750000 |   |              |              |              |
| H  | 17.282097000 | 8.627893000  | 4.428727000 |   |              |              |              |
| C  | 18.090479000 | 10.720222000 | 4.482358000 |   |              |              |              |
| H  | 18.358103000 | 10.910446000 | 3.449193000 |   |              |              |              |
| C  | 16.796121000 | 14.455878000 | 2.419699000 |   |              |              |              |
| H  | 15.769231000 | 14.569077000 | 2.041722000 |   |              |              |              |
| H  | 17.027003000 | 15.322673000 | 3.060027000 |   |              |              |              |
| C  | 17.797114000 | 14.323626000 | 1.291806000 |   |              |              |              |
| H  | 17.557705000 | 13.458552000 | 0.658222000 |   |              |              |              |
| H  | 17.775784000 | 15.226484000 | 0.664444000 |   |              |              |              |
| H  | 18.816517000 | 14.198455000 | 1.682146000 |   |              |              |              |



Table S9: Cartesian coordinates for the optimized structure **4a**.

|    | x            | y            | z           |   | x            | y            | z            |
|----|--------------|--------------|-------------|---|--------------|--------------|--------------|
| N  | 11.967727000 | 12.911820000 | 2.785301000 | C | 15.436194000 | 15.450278000 | 5.651767000  |
| Te | 11.394731000 | 13.352796000 | 1.032632000 | H | 14.623420000 | 15.468220000 | 4.914024000  |
| Ru | 12.535336000 | 12.582137000 | 4.359064000 | H | 14.137933000 | 14.758343000 | 7.220125000  |
| Cl | 11.848741000 | 14.612283000 | 5.246539000 | C | 14.881037000 | 15.547356000 | 7.053918000  |
| Cl | 10.602397000 | 11.527648000 | 5.087829000 | H | 15.681455000 | 15.472400000 | 7.802974000  |
| P  | 14.593037000 | 11.392312000 | 6.698955000 | C | 15.111698000 | 13.117644000 | 10.188043000 |
| O  | 14.080593000 | 9.994750000  | 7.339689000 | H | 14.452964000 | 13.398873000 | 11.022378000 |
| O  | 14.411036000 | 13.403084000 | 3.856802000 | H | 15.599186000 | 14.026903000 | 9.812237000  |
| O  | 13.369606000 | 12.205508000 | 6.241992000 | H | 15.884586000 | 12.438025000 | 10.573418000 |
| O  | 13.328791000 | 10.704924000 | 3.846819000 | H | 14.841609000 | 5.988164000  | 3.966485000  |
| C  | 14.298068000 | 12.453846000 | 9.099163000 | C | 14.963006000 | 11.031304000 | 1.386247000  |
| H  | 13.518010000 | 13.121985000 | 8.705625000 | H | 16.147936000 | 16.262096000 | 5.436244000  |
| H  | 13.818149000 | 11.530584000 | 9.457044000 | H | 14.373944000 | 16.515622000 | 7.177159000  |
| C  | 12.786778000 | 9.405210000  | 6.998294000 | H | 13.735011000 | 11.049229000 | -0.382275000 |
| H  | 12.462590000 | 9.753565000  | 6.009075000 | H | 14.436532000 | 9.453861000  | -0.002799000 |
| H  | 12.976520000 | 8.323770000  | 6.955182000 | H | 13.066886000 | 10.089349000 | 0.957483000  |
| C  | 11.751355000 | 9.758370000  | 8.044422000 | H | 15.889914000 | 11.335794000 | 0.880478000  |
| H  | 11.545843000 | 10.836386000 | 8.029417000 | H | 14.515915000 | 11.922035000 | 1.847858000  |
| H  | 10.809219000 | 9.239665000  | 7.813941000 |   |              |              |              |
| H  | 12.079295000 | 9.455469000  | 9.049501000 |   |              |              |              |
| C  | 13.693814000 | 7.801828000  | 3.672530000 |   |              |              |              |
| O  | 14.705834000 | 8.629670000  | 4.321141000 |   |              |              |              |
| H  | 12.703336000 | 8.221885000  | 3.898445000 |   |              |              |              |
| H  | 13.850275000 | 7.844724000  | 2.583520000 |   |              |              |              |
| C  | 13.847078000 | 6.392296000  | 4.200674000 |   |              |              |              |
| H  | 13.706827000 | 6.364312000  | 5.289936000 |   |              |              |              |
| H  | 13.091569000 | 5.739539000  | 3.739947000 |   |              |              |              |
| C  | 13.994036000 | 10.359916000 | 0.435188000 |   |              |              |              |
| Co | 16.184129000 | 11.117834000 | 5.279836000 |   |              |              |              |
| P  | 15.790869000 | 13.054409000 | 4.445538000 |   |              |              |              |
| P  | 14.783245000 | 10.199485000 | 3.931140000 |   |              |              |              |
| O  | 16.846126000 | 13.243527000 | 3.216183000 |   |              |              |              |
| O  | 16.198591000 | 14.208167000 | 5.504913000 |   |              |              |              |
| O  | 15.208074000 | 12.111126000 | 8.010349000 |   |              |              |              |
| O  | 15.373175000 | 10.089805000 | 2.418561000 |   |              |              |              |
| C  | 18.187306000 | 11.646568000 | 5.559751000 |   |              |              |              |
| H  | 18.561615000 | 12.663087000 | 5.494709000 |   |              |              |              |
| C  | 17.685650000 | 11.019056000 | 6.736139000 |   |              |              |              |
| H  | 17.597772000 | 11.478897000 | 7.713844000 |   |              |              |              |
| C  | 17.249327000 | 9.698490000  | 6.381587000 |   |              |              |              |
| H  | 16.783448000 | 8.977629000  | 7.045341000 |   |              |              |              |
| C  | 17.503522000 | 9.516365000  | 4.987680000 |   |              |              |              |
| H  | 17.262427000 | 8.628257000  | 4.413461000 |   |              |              |              |
| C  | 18.074569000 | 10.718828000 | 4.471317000 |   |              |              |              |
| H  | 18.338117000 | 10.912295000 | 3.437711000 |   |              |              |              |
| C  | 16.764461000 | 14.451347000 | 2.409157000 |   |              |              |              |
| H  | 15.735527000 | 14.560123000 | 2.035582000 |   |              |              |              |
| H  | 16.995213000 | 15.319920000 | 3.047091000 |   |              |              |              |
| C  | 17.760778000 | 14.321088000 | 1.276946000 |   |              |              |              |
| H  | 17.520070000 | 13.455998000 | 0.643815000 |   |              |              |              |
| H  | 17.734976000 | 15.224083000 | 0.649949000 |   |              |              |              |
| H  | 18.782150000 | 14.197477000 | 1.662626000 |   |              |              |              |

Table S10: Cartesian coordinates for the optimized structure **1b**.

|    | x            | y            | z            |   | x            | y            | z            |
|----|--------------|--------------|--------------|---|--------------|--------------|--------------|
| N  | 11.913319000 | 12.809031000 | 2.526581000  | C | 15.696636000 | 15.273280000 | 5.219157000  |
| O  | 10.865031000 | 13.139641000 | 2.044691000  | H | 14.773030000 | 15.261078000 | 4.623098000  |
| Ru | 12.768573000 | 12.527182000 | 4.068367000  | H | 14.682110000 | 14.361843000 | 6.874604000  |
| Cl | 12.156317000 | 14.602468000 | 4.986566000  | C | 15.354733000 | 15.208598000 | 6.692183000  |
| Cl | 10.924296000 | 11.449126000 | 5.044067000  | H | 16.261076000 | 15.110674000 | 7.308014000  |
| P  | 15.219052000 | 11.235217000 | 6.095287000  | C | 16.374657000 | 12.600635000 | 9.599052000  |
| O  | 14.769812000 | 9.764080000  | 6.656729000  | H | 15.869610000 | 12.805250000 | 10.555148000 |
| O  | 14.619910000 | 13.360504000 | 3.316471000  | H | 16.772795000 | 13.547220000 | 9.208422000  |
| O  | 14.002689000 | 12.129843000 | 5.944461000  | H | 17.217391000 | 11.920367000 | 9.790428000  |
| O  | 13.565610000 | 10.598552000 | 3.485465000  | H | 15.086566000 | 5.913617000  | 3.299469000  |
| C  | 15.397160000 | 11.986828000 | 8.616791000  | C | 14.667699000 | 11.183237000 | 0.822338000  |
| H  | 14.549578000 | 12.659742000 | 8.417025000  | H | 16.285986000 | 16.173032000 | 4.975020000  |
| H  | 14.993950000 | 11.033437000 | 8.995311000  | H | 14.822884000 | 16.127438000 | 6.981735000  |
| C  | 13.396129000 | 9.298002000  | 6.505417000  | H | 12.947747000 | 11.310960000 | -0.466368000 |
| H  | 12.951040000 | 9.710058000  | 5.589630000  | H | 13.639606000 | 9.666771000  | -0.343869000 |
| H  | 13.485695000 | 8.205676000  | 6.403648000  | H | 12.684450000 | 10.359392000 | 1.009086000  |
| C  | 12.551990000 | 9.681598000  | 7.704044000  | H | 15.402227000 | 11.453071000 | 0.048502000  |
| H  | 12.416114000 | 10.770125000 | 7.732361000  | H | 14.423018000 | 12.082377000 | 1.404383000  |
| H  | 11.552526000 | 9.232838000  | 7.602942000  |   |              |              |              |
| H  | 13.005818000 | 9.330779000  | 8.644360000  |   |              |              |              |
| C  | 13.973504000 | 7.762844000  | 3.076077000  |   |              |              |              |
| O  | 15.093276000 | 8.565102000  | 3.526843000  |   |              |              |              |
| H  | 13.038756000 | 8.229129000  | 3.420134000  |   |              |              |              |
| H  | 13.965179000 | 7.749068000  | 1.973378000  |   |              |              |              |
| C  | 14.147905000 | 6.369680000  | 3.646387000  |   |              |              |              |
| H  | 14.164821000 | 6.404061000  | 4.744684000  |   |              |              |              |
| H  | 13.311827000 | 5.726967000  | 3.332087000  |   |              |              |              |
| C  | 13.411615000 | 10.585094000 | 0.218857000  |   |              |              |              |
| Co | 16.606546000 | 11.060620000 | 4.435084000  |   |              |              |              |
| P  | 16.038863000 | 13.026718000 | 3.765538000  |   |              |              |              |
| P  | 15.017092000 | 10.180860000 | 3.273441000  |   |              |              |              |
| O  | 17.004256000 | 13.336793000 | 2.464033000  |   |              |              |              |
| O  | 16.538549000 | 14.137549000 | 4.848997000  |   |              |              |              |
| O  | 16.108173000 | 11.737491000 | 7.381479000  |   |              |              |              |
| O  | 15.352139000 | 10.212347000 | 1.667406000  |   |              |              |              |
| C  | 18.625140000 | 11.623706000 | 4.363008000  |   |              |              |              |
| H  | 18.953039000 | 12.648300000 | 4.221852000  |   |              |              |              |
| C  | 18.344845000 | 11.004344000 | 5.614816000  |   |              |              |              |
| H  | 18.399011000 | 11.479399000 | 6.587243000  |   |              |              |              |
| C  | 17.877853000 | 9.672987000  | 5.353069000  |   |              |              |              |
| H  | 17.538497000 | 8.956027000  | 6.093842000  |   |              |              |              |
| C  | 17.891524000 | 9.477362000  | 3.938280000  |   |              |              |              |
| H  | 17.556921000 | 8.583593000  | 3.423073000  |   |              |              |              |
| C  | 18.347033000 | 10.681998000 | 3.319002000  |   |              |              |              |
| H  | 18.416126000 | 10.871496000 | 2.253661000  |   |              |              |              |
| C  | 16.743834000 | 14.543964000 | 1.714387000  |   |              |              |              |
| H  | 15.674375000 | 14.587834000 | 1.458716000  |   |              |              |              |
| H  | 16.979084000 | 15.419933000 | 2.343678000  |   |              |              |              |
| C  | 17.613395000 | 14.516192000 | 0.472323000  |   |              |              |              |
| H  | 17.369960000 | 13.642538000 | -0.148691000 |   |              |              |              |
| H  | 17.447654000 | 15.424238000 | -0.126783000 |   |              |              |              |
| H  | 18.679116000 | 14.464947000 | 0.738547000  |   |              |              |              |

Table S11: Cartesian coordinates for the optimized structure **2b**.

|    | x            | y            | z           |   | x            | y            | z            |
|----|--------------|--------------|-------------|---|--------------|--------------|--------------|
| N  | 12.028345000 | 12.756827000 | 2.568052000 | C | 15.331586000 | 15.390743000 | 5.628998000  |
| S  | 10.859366000 | 13.155556000 | 1.594364000 | H | 14.541226000 | 15.350926000 | 4.866536000  |
| Ru | 12.582408000 | 12.576534000 | 4.249872000 | H | 14.004188000 | 14.648760000 | 7.141810000  |
| Cl | 11.865198000 | 14.706425000 | 4.891430000 | C | 14.712745000 | 15.474672000 | 7.006879000  |
| Cl | 10.581087000 | 11.598199000 | 4.956850000 | H | 15.482901000 | 15.446254000 | 7.792150000  |
| P  | 14.630419000 | 11.416570000 | 6.678686000 | C | 15.191680000 | 13.104169000 | 10.186315000 |
| O  | 14.083472000 | 9.994789000  | 7.276296000 | H | 14.532378000 | 13.409690000 | 11.012740000 |
| O  | 14.535864000 | 13.342451000 | 3.734977000 | H | 15.680439000 | 14.001450000 | 9.782735000  |
| O  | 13.455604000 | 12.292109000 | 6.269149000 | H | 15.967128000 | 12.436883000 | 10.590227000 |
| O  | 13.387548000 | 10.606254000 | 3.911439000 | H | 14.893203000 | 5.929710000  | 4.242502000  |
| C  | 14.383787000 | 12.408950000 | 9.109222000 | C | 14.824213000 | 11.062991000 | 1.384895000  |
| H  | 13.603338000 | 13.069009000 | 8.701680000 | H | 15.997928000 | 16.246628000 | 5.427919000  |
| H  | 13.894879000 | 11.499976000 | 9.496169000 | H | 14.148652000 | 16.415388000 | 7.094543000  |
| C  | 12.755427000 | 9.501609000  | 6.927856000 | H | 13.274923000 | 11.060823000 | -0.106142000 |
| H  | 12.466114000 | 9.855994000  | 5.929620000 | H | 13.976990000 | 9.444014000  | 0.211123000  |
| H  | 12.863339000 | 8.406420000  | 6.904355000 | H | 12.847276000 | 10.205624000 | 1.383393000  |
| C  | 11.726381000 | 9.940759000  | 7.950134000 | H | 15.647908000 | 11.292402000 | 0.692292000  |
| H  | 11.587143000 | 11.028145000 | 7.899081000 | H | 14.494218000 | 11.994109000 | 1.864481000  |
| H  | 10.757175000 | 9.477722000  | 7.711802000 |   |              |              |              |
| H  | 12.020466000 | 9.644419000  | 8.969338000 |   |              |              |              |
| C  | 13.878944000 | 7.751584000  | 3.641542000 |   |              |              |              |
| O  | 14.895655000 | 8.587800000  | 4.248105000 |   |              |              |              |
| H  | 12.900885000 | 8.243247000  | 3.748597000 |   |              |              |              |
| H  | 14.098129000 | 7.649509000  | 2.565646000 |   |              |              |              |
| C  | 13.908112000 | 6.408430000  | 4.342475000 |   |              |              |              |
| H  | 13.688147000 | 6.527859000  | 5.412618000 |   |              |              |              |
| H  | 13.150954000 | 5.739919000  | 3.905774000 |   |              |              |              |
| C  | 13.664646000 | 10.391953000 | 0.675953000 |   |              |              |              |
| Co | 16.259827000 | 11.099583000 | 5.278779000 |   |              |              |              |
| P  | 15.859901000 | 13.035023000 | 4.430562000 |   |              |              |              |
| P  | 14.856878000 | 10.190239000 | 3.917934000 |   |              |              |              |
| O  | 17.028551000 | 13.288811000 | 3.297037000 |   |              |              |              |
| O  | 16.170259000 | 14.198633000 | 5.530978000 |   |              |              |              |
| O  | 15.292045000 | 12.036368000 | 8.045127000 |   |              |              |              |
| O  | 15.418583000 | 10.174302000 | 2.380696000 |   |              |              |              |
| C  | 18.211786000 | 11.596119000 | 5.844970000 |   |              |              |              |
| H  | 18.545026000 | 12.615239000 | 6.013829000 |   |              |              |              |
| C  | 17.641439000 | 10.729418000 | 6.822062000 |   |              |              |              |
| H  | 17.441687000 | 10.987073000 | 7.855856000 |   |              |              |              |
| C  | 17.280205000 | 9.504085000  | 6.176483000 |   |              |              |              |
| H  | 16.771347000 | 8.662431000  | 6.633779000 |   |              |              |              |
| C  | 17.664375000 | 9.610523000  | 4.799825000 |   |              |              |              |
| H  | 17.498011000 | 8.856169000  | 4.038014000 |   |              |              |              |
| C  | 18.239585000 | 10.894441000 | 4.590410000 |   |              |              |              |
| H  | 18.572316000 | 11.301545000 | 3.642637000 |   |              |              |              |
| C  | 16.919252000 | 14.476222000 | 2.478426000 |   |              |              |              |
| H  | 15.884270000 | 14.572664000 | 2.117357000 |   |              |              |              |
| H  | 17.152216000 | 15.361123000 | 3.095783000 |   |              |              |              |
| C  | 17.897813000 | 14.340135000 | 1.328410000 |   |              |              |              |
| H  | 17.651971000 | 13.460843000 | 0.716684000 |   |              |              |              |
| H  | 17.854047000 | 15.232565000 | 0.686017000 |   |              |              |              |
| H  | 18.927588000 | 14.228624000 | 1.698030000 |   |              |              |              |

Table S12: Cartesian coordinates for the optimized structure **3b**.

|    | x            | y            | z           |   | x            | y            | z            |
|----|--------------|--------------|-------------|---|--------------|--------------|--------------|
| N  | 12.130982000 | 12.865051000 | 2.567182000 | C | 15.343742000 | 15.409754000 | 5.686902000  |
| Se | 12.487286000 | 14.024389000 | 1.291696000 | H | 14.552693000 | 15.405635000 | 4.924313000  |
| Ru | 12.542037000 | 12.598858000 | 4.261562000 | H | 14.028881000 | 14.597513000 | 7.175193000  |
| Cl | 11.841674000 | 14.690209000 | 5.011038000 | C | 14.728452000 | 15.435302000 | 7.068825000  |
| Cl | 10.562098000 | 11.549270000 | 4.959624000 | H | 15.501314000 | 15.385811000 | 7.850330000  |
| P  | 14.600900000 | 11.374252000 | 6.690858000 | C | 15.159975000 | 13.006175000 | 10.222451000 |
| O  | 14.077981000 | 9.932886000  | 7.263369000 | H | 14.501417000 | 13.288211000 | 11.057659000 |
| O  | 14.448355000 | 13.390774000 | 3.831696000 | H | 15.636223000 | 13.916811000 | 9.833984000  |
| O  | 13.407731000 | 12.229189000 | 6.301848000 | H | 15.944761000 | 12.339821000 | 10.609453000 |
| O  | 13.388541000 | 10.647095000 | 3.869028000 | H | 14.826289000 | 5.938664000  | 4.237632000  |
| C  | 14.354287000 | 12.322649000 | 9.136313000 | C | 14.969439000 | 11.030288000 | 1.403841000  |
| H  | 13.566895000 | 12.982870000 | 8.742399000 | H | 16.014374000 | 16.268857000 | 5.520664000  |
| H  | 13.875329000 | 11.402418000 | 9.508516000 | H | 14.154587000 | 16.365896000 | 7.193432000  |
| C  | 12.751762000 | 9.440179000  | 6.908949000 | H | 13.489329000 | 11.162084000 | -0.143915000 |
| H  | 12.452779000 | 9.820617000  | 5.922811000 | H | 14.065522000 | 9.491461000  | 0.169195000  |
| H  | 12.866525000 | 8.347063000  | 6.854954000 | H | 12.940491000 | 10.310200000 | 1.307626000  |
| C  | 11.724356000 | 9.845768000  | 7.946641000 | H | 15.838000000 | 11.205610000 | 0.751999000  |
| H  | 11.579408000 | 10.933354000 | 7.924675000 | H | 14.687933000 | 11.983260000 | 1.871050000  |
| H  | 10.756913000 | 9.383257000  | 7.700173000 |   |              |              |              |
| H  | 12.024282000 | 9.524706000  | 8.956550000 |   |              |              |              |
| C  | 13.809343000 | 7.775604000  | 3.689738000 |   |              |              |              |
| O  | 14.828758000 | 8.598553000  | 4.312488000 |   |              |              |              |
| H  | 12.832027000 | 8.265147000  | 3.811996000 |   |              |              |              |
| H  | 14.023865000 | 7.700043000  | 2.610940000 |   |              |              |              |
| C  | 13.842807000 | 6.415985000  | 4.357464000 |   |              |              |              |
| H  | 13.631505000 | 6.508072000  | 5.431992000 |   |              |              |              |
| H  | 13.081169000 | 5.759919000  | 3.909953000 |   |              |              |              |
| C  | 13.797845000 | 10.451281000 | 0.637205000 |   |              |              |              |
| Co | 16.232505000 | 11.126443000 | 5.289214000 |   |              |              |              |
| P  | 15.802526000 | 13.060363000 | 4.452593000 |   |              |              |              |
| P  | 14.842248000 | 10.189075000 | 3.933453000 |   |              |              |              |
| O  | 16.901869000 | 13.289526000 | 3.254540000 |   |              |              |              |
| O  | 16.180000000 | 14.220387000 | 5.533917000 |   |              |              |              |
| O  | 15.262683000 | 11.977416000 | 8.062525000 |   |              |              |              |
| O  | 15.447014000 | 10.093987000 | 2.417312000 |   |              |              |              |
| C  | 18.233828000 | 11.690220000 | 5.559285000 |   |              |              |              |
| H  | 18.580820000 | 12.715227000 | 5.477337000 |   |              |              |              |
| C  | 17.747939000 | 11.067361000 | 6.744409000 |   |              |              |              |
| H  | 17.642212000 | 11.539452000 | 7.714178000 |   |              |              |              |
| C  | 17.330511000 | 9.736583000  | 6.405996000 |   |              |              |              |
| H  | 16.869100000 | 9.019559000  | 7.077175000 |   |              |              |              |
| C  | 17.581089000 | 9.543591000  | 5.012612000 |   |              |              |              |
| H  | 17.340560000 | 8.650000000  | 4.446761000 |   |              |              |              |
| C  | 18.132153000 | 10.749230000 | 4.481163000 |   |              |              |              |
| H  | 18.374924000 | 10.940956000 | 3.442075000 |   |              |              |              |
| C  | 16.698300000 | 14.413178000 | 2.358362000 |   |              |              |              |
| H  | 15.646956000 | 14.430220000 | 2.030502000 |   |              |              |              |
| H  | 16.902176000 | 15.348773000 | 2.907239000 |   |              |              |              |
| C  | 17.645742000 | 14.250141000 | 1.187471000 |   |              |              |              |
| H  | 17.428251000 | 13.321435000 | 0.641509000 |   |              |              |              |
| H  | 17.527473000 | 15.093424000 | 0.490636000 |   |              |              |              |
| H  | 18.692795000 | 14.219523000 | 1.523009000 |   |              |              |              |

Table S13: Cartesian coordinates for the optimized structure **4b**.

|    | x            | y            | z           |   | x            | y            | z            |
|----|--------------|--------------|-------------|---|--------------|--------------|--------------|
| N  | 12.124447000 | 12.847723000 | 2.566525000 | C | 15.338015000 | 15.412437000 | 5.675394000  |
| Te | 12.503561000 | 14.210677000 | 1.163145000 | H | 14.555269000 | 15.413239000 | 4.904456000  |
| Ru | 12.531429000 | 12.595132000 | 4.247466000 | H | 14.009756000 | 14.595360000 | 7.149559000  |
| Cl | 11.824552000 | 14.674271000 | 5.004154000 | C | 14.709723000 | 15.433844000 | 7.051591000  |
| Cl | 10.561628000 | 11.543269000 | 4.954122000 | H | 15.475677000 | 15.382387000 | 7.839700000  |
| P  | 14.598396000 | 11.374139000 | 6.687093000 | C | 15.155348000 | 13.014211000 | 10.214950000 |
| O  | 14.080108000 | 9.932418000  | 7.262398000 | H | 14.497065000 | 13.296946000 | 11.050104000 |
| O  | 14.438663000 | 13.391493000 | 3.831038000 | H | 15.631275000 | 13.924629000 | 9.825593000  |
| O  | 13.402381000 | 12.222894000 | 6.293893000 | H | 15.940305000 | 12.348375000 | 10.602402000 |
| O  | 13.384750000 | 10.646395000 | 3.862928000 | H | 14.829278000 | 5.940130000  | 4.242195000  |
| C  | 14.349688000 | 12.329422000 | 9.129744000 | C | 14.963683000 | 11.016646000 | 1.394390000  |
| H  | 13.562213000 | 12.988912000 | 8.734935000 | H | 16.012467000 | 16.270093000 | 5.518847000  |
| H  | 13.871260000 | 11.409262000 | 9.502688000 | H | 14.134605000 | 16.363914000 | 7.173902000  |
| C  | 12.755495000 | 9.434771000  | 6.909117000 | H | 13.487031000 | 11.126754000 | -0.158189000 |
| H  | 12.456620000 | 9.811109000  | 5.921429000 | H | 14.070728000 | 9.462018000  | 0.172404000  |
| H  | 12.873315000 | 8.341898000  | 6.858906000 | H | 12.938198000 | 10.286550000 | 1.299719000  |
| C  | 11.726574000 | 9.841005000  | 7.945106000 | H | 15.832318000 | 11.192459000 | 0.743187000  |
| H  | 11.579049000 | 10.928177000 | 7.920557000 | H | 14.676346000 | 11.971701000 | 1.853930000  |
| H  | 10.760375000 | 9.375138000  | 7.699934000 |   |              |              |              |
| H  | 12.026903000 | 9.523374000  | 8.955888000 |   |              |              |              |
| C  | 13.808509000 | 7.773132000  | 3.689482000 |   |              |              |              |
| O  | 14.824015000 | 8.599751000  | 4.314728000 |   |              |              |              |
| H  | 12.829601000 | 8.260313000  | 3.808273000 |   |              |              |              |
| H  | 14.026576000 | 7.697419000  | 2.611513000 |   |              |              |              |
| C  | 13.843923000 | 6.414359000  | 4.358615000 |   |              |              |              |
| H  | 13.628725000 | 6.506415000  | 5.432351000 |   |              |              |              |
| H  | 13.085984000 | 5.755405000  | 3.909149000 |   |              |              |              |
| C  | 13.796997000 | 10.424920000 | 0.630486000 |   |              |              |              |
| Co | 16.228484000 | 11.128109000 | 5.284094000 |   |              |              |              |
| P  | 15.796489000 | 13.061043000 | 4.446064000 |   |              |              |              |
| P  | 14.839004000 | 10.187775000 | 3.929176000 |   |              |              |              |
| O  | 16.891874000 | 13.285861000 | 3.246877000 |   |              |              |              |
| O  | 16.173736000 | 14.221918000 | 5.525525000 |   |              |              |              |
| O  | 15.258453000 | 11.983191000 | 8.056139000 |   |              |              |              |
| O  | 15.445502000 | 10.089959000 | 2.415991000 |   |              |              |              |
| C  | 18.227028000 | 11.695767000 | 5.554007000 |   |              |              |              |
| H  | 18.572520000 | 12.721379000 | 5.473399000 |   |              |              |              |
| C  | 17.742929000 | 11.070364000 | 6.738597000 |   |              |              |              |
| H  | 17.636888000 | 11.540974000 | 7.709048000 |   |              |              |              |
| C  | 17.327479000 | 9.739447000  | 6.398485000 |   |              |              |              |
| H  | 16.867625000 | 9.020585000  | 7.068742000 |   |              |              |              |
| C  | 17.578359000 | 9.548824000  | 5.004674000 |   |              |              |              |
| H  | 17.340437000 | 8.655160000  | 4.437810000 |   |              |              |              |
| C  | 18.127428000 | 10.755820000 | 4.474611000 |   |              |              |              |
| H  | 18.369105000 | 10.949586000 | 3.435684000 |   |              |              |              |
| C  | 16.702905000 | 14.420304000 | 2.359259000 |   |              |              |              |
| H  | 15.649868000 | 14.458484000 | 2.036942000 |   |              |              |              |
| H  | 16.927995000 | 15.346933000 | 2.914778000 |   |              |              |              |
| C  | 17.638418000 | 14.248517000 | 1.180635000 |   |              |              |              |
| H  | 17.397399000 | 13.330216000 | 0.627121000 |   |              |              |              |
| H  | 17.530877000 | 15.100537000 | 0.492855000 |   |              |              |              |
| H  | 18.687329000 | 14.193999000 | 1.507346000 |   |              |              |              |
